# Supplementary material for: Temperature and the expression of myogenic regulatory factors (MRFs) and myosin heavy chain isoforms during embryogenesis in the common carpCyprinus carpioL.
Source: Oxford University Press journal article supplement (doi:10.1242/jeb.01263), 2004-11-05
Supplement: jeb01263-sup-suppdata1.pdf [file jeb01263-sup-suppdata1.pdf]

*Fugu* MyoD ORF predicted from Ensembl (release 23.2c.1) genomic Scaffold 1617, bases 21499-23256

1 ATGGAGCTGTCGGAGATCTCCTTCTCCATCCCTGCCGCTGACGACTTCTATGACGACCCC  
1 M E L S E I S F S I P A A D D F Y D D P

61 TGCTTCAGCACCTCTGACATGCACTTTTTTGGAGACATGGACCCCCGCTGGTCCACGCG  
21 C F S T S D M H F F E D M D P R L V H A

121 GGCCTGCTGAAGCCGGATGACTGCTGCTCTTCATCCTCACTCTCTCCTTCCTCATCTTCC  
41 G L L K P D D C C S S S S L S P S S S S

181 GCTTCCCCATCGTCCCTTCTGCACATTCATCATCACACCGAGGCGGAGGACGACGAGCAC  
61 A S P S S L L H I H H H T E A E D D E H

241 ATCCGTGCACCCAGCGGGCACCACCATGCAGGCCGCTGTCTCCTCTGGGCCTGCAAGGCC  
81 I R A P S G H H H A G R C L L W A C K A

301 TGCAAGCGGAAGACTACAAACGTGGACCGACGGAAGGCGGCGACGCTGCGTGAGCGGCGG  
101 C K R K T T N V D R R K A A T L R E R R

361 CGGCTAAGCAAAGTCAACGAGGCCTTCGAGACGTTGAAACGCTGCACAAACACCAACCCG  
121 R L S K V N E A F E T L K R C T N T N P

421 AACCAGCGGCTGCCCAAAGTGGAGATCCTGAGGAACGCCATCAGCTATATCGAATCCCTG  
141 N Q R L P K V E I L R N A I S Y I E S L

481 CAGGCACTGCTCCGAGGCGGCCAGGACGAGGCCTTCTACACCGTTCTGGAGCACTACAGC  
161 Q A L L R G G Q D E A F Y T V L E H Y S

541 GGGACTCCGACGCGTCTAGCCCTCGCTCCAAGTCTCCGATGGCATGACGGATTTTAAAC  
181 G D S D A S S P R S N C S D G M T D F N

601 GGTCCGACCTGTCAATCAAACAGAAGAGGAAGCTATTACAGCAGCTATTTCTCGCAAAC  
201 G P T C Q S N R R G S Y Y S S Y F S Q T

661 CCAAAAAGCCTGAAGGCGGAGCGGAACTCCAGTCTCGACTGTCTGTCCAGCATCGTGGAG  
221 P K S L K A E R N S S L D C L S S I V E

721 CGGATCTCCACCGCCACCAGCAGCGGGCCGCCACCCGTAGACGGCCGCGGGTCTCCTGGG  
241 R I S T A T S S G P P P V D G R G S P G

781 CCCCTTCAGGCCTCCTCTCCAAGGAGCAGTCGGGAACCAAACCTGATTTATCAGGTCCTG  
261 P L Q A S S P R S S R E P N L I Y Q V L

*Fugu* myogenin ORF predicted from Ensembl (release 23.2c.1) genomic Scaffold 208, bases 195095-196347

```
1      ATGGAGCTTTTTGAGACCAACCCTTACTTCTTTCCCGACCAGCGCTTCTACGAGGGAGGA
1      M E L F E T N P Y F F P D Q R F Y E G G

61     GATACCTACTTCCCCTCTCGTTTACCTGGGTCCTACGACCAAGGCACCTACCAGGATAGG
21     D T Y F P S R L P G S Y D Q G T Y Q D R

121    AACACCATGATGGGCTTGTGTGGGAGTCTGTCCGGAGGTGTGGATGTTGGAGTGACAGGG
41     N T M M G L C G S L S G G V D V G V T G

181    ACAGAGGACAAAGCCTCTCCATCCAGCCTGTCACCTCACTCTGAGCCACACTGCCCGGGC
61     T E D K A S P S S L S P H S E P H C P G

241    CAGTGCCTTCCCTGGGCCTGCAAGTTATGCAAGAGGAAGACGGTCACCATGGACCGCCGG
81     Q C L P W A C K L C K R K T V T M D R R

301    AGAGCGGCCACGCTGAGAGAGAAGAGGCGCCTGAAGAAGGTGAACGAGGCCTTCGACGCT
101    R A A T L R E K R R L K K V N E A F D A

361    TTGAAGAGGAGCACGTTGATGAACCCAAACCAGAGGCTGCCCAAGGTGGAGATCCTCAGG
121    L K R S T L M N P N Q R L P K V E I L R

421    AGCGCCATCCAGTATATCGAAAAGCTACAGGCCTTGGTGTCTCCCTCAACCAGCAGGAC
141    S A I Q Y I E K L Q A L V S S L N Q Q D

481    ACTGAGACGGGACAGCAGGGACTGCACTTCCGGACCAGCGCGGTCCAACCCAGGGTGTCTG
161    T E T G Q Q G L H F R T S A V Q P R V S

541    TCATCCAGCGAGCCCAGCTCAGGCAGCACGTGCTGCAGCAGCCCAGAGTGGAGCAGCACC
181    S S S E P S S G S T C C S S P E W S S T

601    CCGACCAGTGCACGCAGAGCTACAGCAGCGAGGATCTTCTGAGCGCTGCCGACTCTCCG
201    P D Q C T Q S Y S S E D L L S A A D S P

661    GACCAAGGGAGCATGCGCACCCCTGACCGCCATCGTGGACAGCATCTCTGCAGCGGACGCC
221    D Q G S M R T L T A I V D S I S A A D A

721    GCCGTGGCCTTTTCTATGGACATTCCCAAG
241    A V A F S M D I P K
```

*Tetraodon* MyoD ORF predicted from Genoscope (release 6) genomic scaffold SCAF7217, bases 4227-5573

1 ATGGAGCTCTCGGAGATCTCCTTCTCCATCCCAGCCGCTGATGACTTCTATGACGACCCC  
1 M E L S E I S F S I P A A D D F Y D D P

61 TGTTTCAGCACCTCTGACATGCACTTTTTTGGAGACCTGGACCCCCGCCTTGTCCACACG  
21 C F S T S D M H F F E D L D P R L V H T

121 AGCCTGCTGAAGCCAGATGACTGTTGCTCCTCATCCTCACTCTCCCCTTCGTCTTCTTAC  
41 S L L K P D D C C S S S S L S P S S S Y

181 TCGTCTCCATCCTCCCTCCAGCACCACCATCACCACGCTGAAGCGGAGGACGACGACGAC  
61 S S P S S L Q H H H H H A E A E D D D D

241 GTCCGTGCACCCAGCGGGCACCACCAGGCGGGTTCGCTGCCTCCTCTGGGCCTGCAAGGCC  
81 V R A P S G H H Q A G R C L L W A C K A

301 TGCAAACGGAAGACCAACGCGGACCGGCGGAAGGCGGCGACGCTGCGTGAGCGGCGGCGC  
101 C K R K T N A D R R K A A T L R E R R R

361 CTCAGCAAAGTCAACGAGGCCTTCGAGACCCTGAAGCGCTGCACCAGCGCCAACCCCAAC  
121 L S K V N E A F E T L K R C T S A N P N

421 CAGCGGCTGCCCAAAGTGGAGATCCTGAGGAACGCCATCAGCTACATCGAGTCCCTGCAG  
141 Q R L P K V E I L R N A I S Y I E S L Q

481 GCGCTGCTCCGAGGCGGCCAGGACGAGGCCTTCTACCCTGTGCTGGAGCACTACAGCGGG  
161 A L L R G G Q D E A F Y P V L E H Y S G

541 GAGTCGGACGCGTCCAGCCCCGCTCCAAGTCTCCGACGGCATGACGGATTTTAATGGT  
181 E S D A S S P R S N C S D G M T D F N G

601 CCTACCTGTCAATCAAGCAGAAGAGGAAGTTATGACAGCAGCTATCTGTCACAAACTCCA  
201 P T C Q S S R R G S Y D S S Y L S Q T P

661 CTGAAGGCGGAGCGCAACTCCAGTCTGGACTGTCTGTCCAGCATCGTGGAGCGGATCTCC  
221 L K A E R N S S L D C L S S I V E R I S

721 ACGGACACCAGCAGCGGTGTNCCGCACCCCGCAGAGGGTCCGCGCCACCCCGGGTGTCCC  
241 T D T S S G V P H P A E G P R H P G C P

781 GTCCTGGCCACCCCCCGCAGAGCAGCCGGGACCCAAACCTG  
261 V L A T P P Q S S R D P N L

*Tetraodon myogenin* ORF predicted from Genoscope (release 6) genomic scaffold SCAF14528, bases 234783-235947

```
1      ATGGAGCTTTTTGAGACCAACCCTTACTTCTTTCCTGACCAGCGCTTCTACGAGGGAGGA
1      M E L F E T N P Y F F P D Q R F Y E G G
61     GATAGCTACTTCCCCTCTCGCCTACCGGGGTCCTACGACCAAAGCACCTACCAGGACCGG
21     D S Y F P S R L P G S Y D Q S T Y Q D R
121    AACTCCATGATGGGCTTGTGCGGGAGTCTGTCTGGAGGTGTCGACGTTGGAGTGACAGGG
41     N S M M G L C G S L S G G V D V G V T G
181    ACAGAGGACAAAGCCTCTCCGTCCAGCCTGTCACCTCACTCTGAGCCACACTGCCCGGGT
61     T E D K A S P S S L S P H S E P H C P G
241    CAGTGCCTTCCCTGGGCCTGCAAGATATGCAAGAGGAAGACGGTCACCATGGACCGTCGG
81     Q C L P W A C K I C K R K T V T M D R R
301    AGGGCCGCCACGCTGAGGGAGAAGAGGCGCCTGAAGAAGGTGAACGAGGCCTTCGACGCT
101    R A A T L R E K R R L K K V N E A F D A
361    TTGAAGAGGAGCACGTTGATGAACCCCAACCAGAGGCTGCCCAAGGTGGAGATCCTCAGG
121    L K R S T L M N P N Q R L P K V E I L R
421    AGCGCCATCCAGTACATCGAAAGGCTGCAGGCCTTGGTGTCTCCCTCAACCAGCAGGAC
141    S A I Q Y I E R L Q A L V S S L N Q Q D
481    ACTGAGACGGCGCAGCAGGCGCTGCACTTCCGGACCAGCGCGGCCCAACCCAGAGTGTCG
161    T E T A Q Q A L H F R T S A A Q P R V S
541    TCATCCAGCGAGCCCAGCTCAGGCAGCACCTGCTGCAGCAGCCCAGAGTGGAGCAGCACC
181    S S S E P S S G S T C C S S P E W S S T
601    CCTGAACAGTGCACGCAGAGCTACAGCAGCGAGGATCTTCTGAGTGCTGCCGACTCTCCG
201    P E Q C T Q S Y S S E D L L S A A D S P
661    GAGCAGGGGAGCATGCGTACCCTGACCGCCATCGTGGACAGCATCTCTGCAGCGGACGCC
221    E Q G S M R T L T A I V D S I S A A D A
721    GCCGTGGCCTTT
241    A V A F
```

*Tetraodon* MRF4 ORF prediction from Genoscope (release 6) genomic scaffold SCAF14691, bases 236320-237613

1 ATGATGGACCTTTTTGAGACCAACACTTATCTTTTCAATGATTTGCGCTATCTGGAGGAG  
1 M M D L F E T N T Y L F N D L R Y L E E

61 GGGATCATGGACCACTGCAGCACTTGGACATGTCCGGGGTGTCCCCCTCTATGACGGG  
21 G D H G P L Q H L D M S G V S P L Y D G

121 AACACAGCCCGCTGTCTCCGGGTCCGGACAACGTCCCCTCTGAGACCGGGGGCGAGAGC  
41 N H S P L S P G P D N V P S E T G G E S

181 AGCGGGGACGAACACGTCCTGGCGCCGCGGGGGTGC CGCGCCCACTGCGAGGGCCAGTGT  
61 S G D E H V L A P P G V R A H C E G Q C

241 CTCATGTGGGCCTGCAAGGTCTGCAAGCGCAAGTCGGCGCCACCGACCGGCGCAAGGCC  
81 L M W A C K V C K R K S A P T D R R K A

301 GCCACGCTGCGGGAGAGGAGGAGGCTGAAGAAGATCAACGAGGCCTTCGACGCGCTCAAG  
101 A T L R E R R R L K K I N E A F D A L K

361 AGGAAGAGCGTGGCCAACCCCAACCAGAGGCTGCCAAGGTGGAGATCCTGCGCAGCGCC  
121 R K S V A N P N Q R L P K V E I L R S A

421 ATCAGCTACATCGAGCGGCTGCAGGAGCTGCTGCAGAGCCTGGACGAGCAGGAGCGCAGC  
141 I S Y I E R L Q E L L Q S L D E Q E R S

481 CCGAAGGGAGCCGGCGACGGCCCAGGAGAAGTTCCACAGCGACCCGGCGGGCGGCGGAC  
161 P K G A G D G P G E V P Q R P G G G G D

541 TACTGCTGGAAAAAGGCCTCGGAGACGTGGCCGACCTCCGCCGACCATTCCGCCATCATT  
181 Y C W K K A S E T W P T S A D H S A I I

601 AACAGAGAGACGGAGCCTGCGAGTCTTCGGCCTCCTCCAGCCTCCTCTGCCTCTCCTCC  
201 N Q R D G A C E S S A S S S L L C L S S

661 ATCGTCAGCAGCATCAGCGACGACAAGACGGACCTCAGACACAGCGTCCCGGGGAAC  
221 I V S S I S D D K T D L R H S V P G N
