# Supplementary material for: Temperature and the expression of myogenic regulatory factors (MRFs) and myosin heavy chain isoforms during embryogenesis in the common carpCyprinus carpioL.
Source: Oxford University Press journal article supplement (doi:10.1242/jeb.01263), 2004-11-05
Supplement: jeb01263-sup-suppdata2.pdf [file jeb01263-sup-suppdata2.pdf]

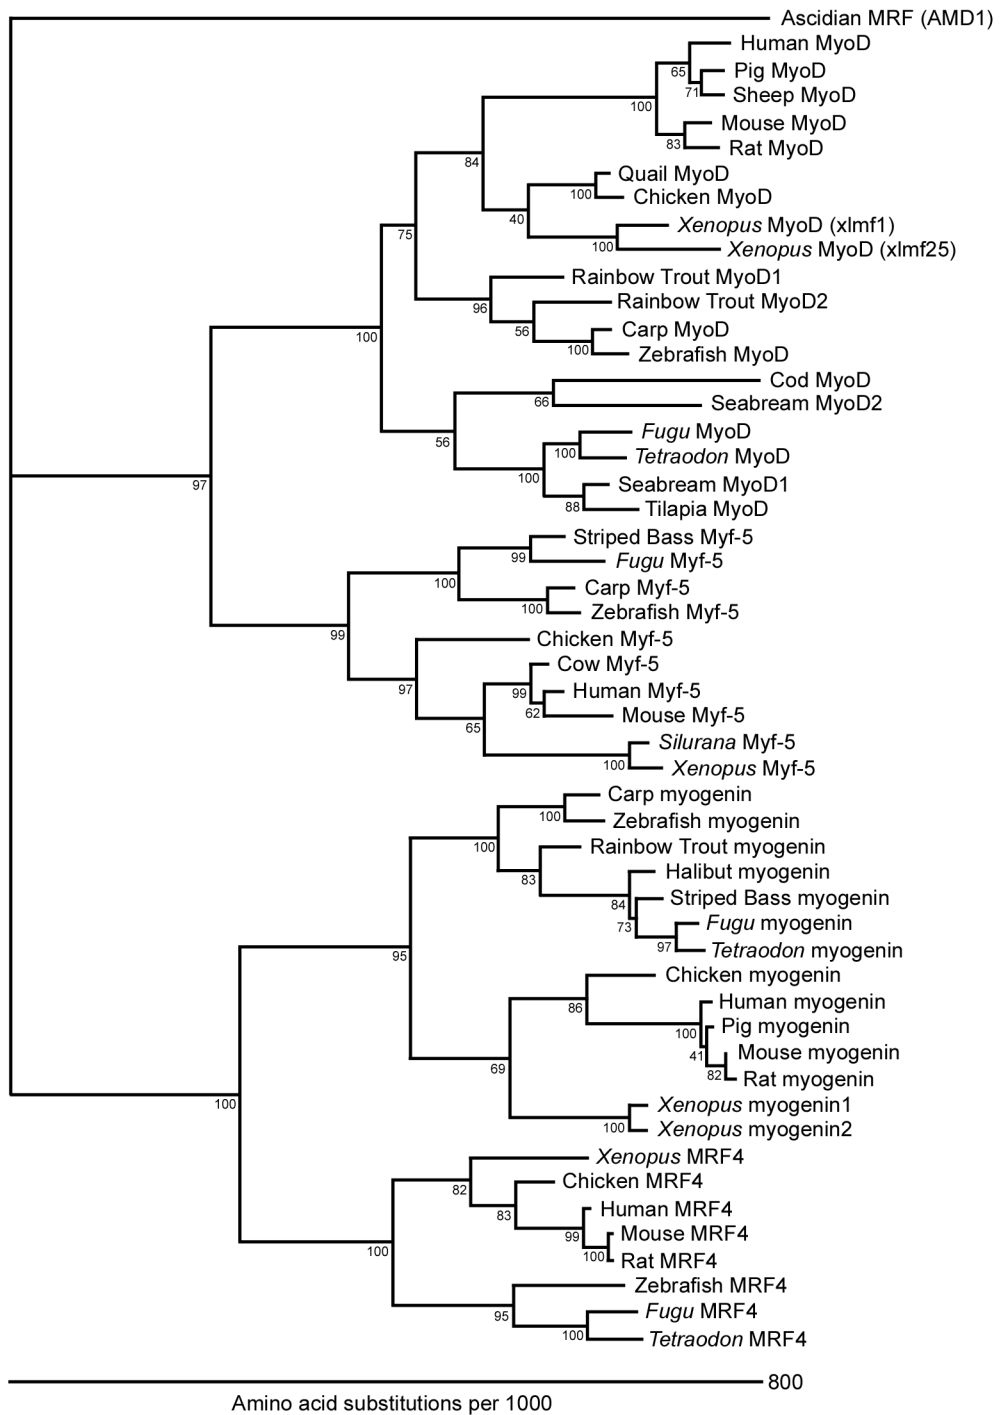

## Accession numbers for MRF sequences used in phylogenetic analyses

|                              |                                       |
|------------------------------|---------------------------------------|
| Ascidian MRF (AMD1)          | D13507                                |
| Carp MyoD                    | AB012882                              |
| Chicken MyoD                 | L34006                                |
| Cod MyoD                     | AF329903                              |
| <i>Fugu</i> MyoD             | Scaffold 1617, 21499-23259 (Ensembl)  |
| Human MyoD                   | NM_002478                             |
| Mouse MyoD                   | XM_124916                             |
| Pig MyoD                     | U12574                                |
| Quail MyoD                   | L16686                                |
| Rainbow Trout MyoD1          | X75798                                |
| Rainbow Trout MyoD2          | Z46924                                |
| Rat MyoD                     | M84176                                |
| Seabream MyoD1               | AF478568                              |
| Seabream MyoD2               | AF478569                              |
| Sheep MyoD                   | X62102                                |
| <i>Tetraodon</i> MyoD        | SCAF14528, 234783-235946 (Genoscope)  |
| Tilapia MyoD                 | AF270790                              |
| <i>Xenopus</i> MyoD (xlmf1)  | M31116                                |
| <i>Xenopus</i> MyoD (xlmf25) | M31118                                |
| Zebrafish MyoD               | NM_131262                             |
| Carp Myf-5                   | AB012883                              |
| Chicken Myf-5                | X73250                                |
| Cow Myf-5                    | M95684                                |
| <i>Fugu</i> Myf-5            | AJ308546                              |
| Human Myf-5                  | NM_005593                             |
| Mouse Myf-5                  | XM_192677                             |
| <i>Silurana</i> Myf-5        | AY050251                              |
| Striped Bass Myf-5           | AF463525                              |
| <i>Xenopus</i> Myf-5         | X56738                                |
| Zebrafish Myf-5              | NM_131576                             |
| Carp myogenin                | AB012881                              |
| Chicken myogenin             | D90157                                |
| <i>Fugu</i> myogenin         | Scaffold 208, 195095-196350 (Ensembl) |
| Halibut myogenin             | AJ487982                              |
| Human myogenin               | NM_002479                             |
| Mouse myogenin               | D90156                                |
| Pig myogenin                 | U14331                                |
| Rainbow trout myogenin       | Z46912                                |
| Rat myogenin                 | NM_017115                             |
| <i>Tetraodon</i> myogenin    | SCAF14528, 234783-235946 (Genoscope)  |
| Striped Bass myogenin        | AF463526                              |
| <i>Xenopus</i> myogenin U1   | AY046531                              |
| <i>Xenopus</i> myogenin U2   | AY046532                              |
| Zebrafish myogenin           | NM_131006                             |
| Chicken MRF4                 | D10599                                |
| Human MRF4                   | NM_002469                             |
| Mouse MRF4                   | NM_008657                             |
| <i>Fugu</i> MRF4             | AJ308546                              |
| Rat MRF4                     | NM_013172                             |
| <i>Tetraodon</i> MRF4        | SCAF14691, 236320-237612 (Genoscope)  |
| <i>Xenopus</i> MRF4          | S84990                                |
| Zebrafish MRF4               | AY_335193                             |
